# Supplementary material for: Detecting and pyramiding target QTL for plant- and grain-related traits via chromosomal segment substitution line of rice
Source: Front Plant Sci. 2022 Dec 16;13:1020847. doi: 10.3389/fpls.2022.1020847 (PMC9800928; doi:10.3389/fpls.2022.1020847)
Supplement: Supplementary file 1 [file Table_1.xlsx]

## Sheet: Phenotypic data of traits
Materials and replications		Plant height (PH, cm)	Panicle length (PL, cm)	Grain length (GL, mm)	Grain width (GW, cm)	1000-grain weight (TGW, g)	Grain no. per panicle (GPP)	Spikelet no. per panicle (SPP)
Nipponbare	R1	80.4	19.11			22.8	74	80.8
	R2	90.5	19.46			25.1	90.8	100.8
	R3	99	21.23			25.4	93.9091	110.909
	R4	97.6	20.13			22.9	95.6	111.867
	R5	90.3	19.1			22.6	87.6667	98.3333
	R6	95.8	19.11			22.4	62.9	74
	R7	86.3	17.88			24.4	86	96.1429
	R8	87	18.9			23.4	92.1667	101
	R9	94.8	21.11			23.6	98.6364	110.545
	R10	85.8	22.33			23.6	92.2	102.3
CSSL-Z1357	R1	119	23.3545	8.06667	3.26667	23.6667	116.636	132.545
	R2	119.5	24.3429	8.43333	3.4	26.6667	115.429	139.286
	R3	129.4	23.1429	8.14333	3.26	26	115.857	129.714
	R4	120.5	23.1	8.3	3.4	26.6667	116.667	138.167
	R5	123	23.9455	7.98333	3.16667	24.6667	95.4545	124
	R6	113	22.6875	8.3	3.36667	25.6667	101.875	107.75
	R7	98.2	19.2143	7.8	3.1	26	96.8571	105.143
	R8	102	20.95	8.13333	3.33333	25	98.3	121.6
	R9	121	21.975	8.46667	3.4	27	122.75	135.375
	R10	98	19.1375	7.9	3.03333	25.3333	99.5	108.25
	R11	90	19.8875	7.9	3	24.3333	85.375	118.375
S1	R1	108.7	20.58			26	74.1111	85.8889
	R2	107.9	17.99			28.7	50.5	62.4
	R3	109.5	20.18			27	48.6	58.8
	R4	111.5	20.07			28.3	60	66.3333
	R5	105.7	20.41			27.6	62.6667	73.75
	R6	110.8	20.94			28.3	62.4286	70.4286
	R7	117.9	20.04			27.3	61.4444	78.3333
	R8	113.2	20.22			26.3	70.7273	82.7273
S2	R1	111.2	20.85			22.3	86.0714	93.6429
	R2	114.9	20.72			22.7	98.6667	123.4
	R3	113.4	20.82			22.3	81.5882	101.412
	R4	110	20.17			23	94	108.364
	R5	117.1	20.18			22.7	93.3333	113
	R6	115.3	20.73			23.7	81.9167	94.75
	R7	107.8	20.2			23	94.6111	105.556
	R8	115.7	21.74			23	105.154	120.769
	R9	107.6	19.22			22.7	87.0833	97.25
	R10	109.6	19.51			22.7	78.1111	98.7222
	R11	106.8	21.25			20	87.3636	98.4545
	R12	105.2	20.39			20.6	95.7273	108.727
	R13	106.1	18.93			23	78.5	92.5
	R14	104.5	19.57			19.7	66	84.7143
	R15	103.2	20.05			20.2	92.3333	113.167
	R16	103.2	20.05			19.7	66.5	85.9
	R17	109.9	17.39			21	62.8333	72.8333
	R18	109.5	20.09			21.4	64.75	90.25
	R19	105.2	19.72			19.2	69.6	93.1
	R20	108.4	18.47			20.6	64.4167	79
S3	R1	110.5	19.26			21	81.1333	98.6
	R2	111.2	18.21			21.7	64.4615	79.8462
	R3	116.7	21.07			21	62.4	90.6
	R4	114.8	18.98			21.3	59.0769	83.3846
	R5	111.4	19.88			24	79.7059	90.2941
	R6	108.4	20.23			20.3	81.3333	96.6667
	R7	109.5	18.09			20.7	53.8182	85.4545
	R8	108.8	18.77			21.3	60.4444	84.5556
	R9	105.4	18.12			20.3	54.75	66.875
	R10	113.3	20.1			22.7	73.625	87.9375
D1	R1	120.1	20.11			25.3	64.9375	82.875
	R2	117.7	20.49			24	72.8182	86.9091
	R3	119.8	21.73			24.7	92.9167	114.667
	R4	117.4	21.48			26	77.6	98.3
	R5	124.3	20.61			26.3	87.2143	96.7857
	R6	123.7	21.03			25.3	84.5	107.9
	R7	118.5	19.38			24.7	65.1818	81.1818
	R8	119.8	21.05			24.7	74.4286	102.929
	R9	116.9	20.87			25	88.5556	104.333
	R10	115.7	21.8			26.3	91.1429	108.714
	R11	108.4	20.78			20	87.1429	98.7857
	R12	108.8	19.1			19	74.3333	91.2778
	R13	107.1	20.7			22.7	71.4615	84.1538
	R14	113	19.17			21	76.7778	92.7778
	R15	107.6	21.1			21.7	92.0714	113.143
	R16	106.6	21.2			20.7	90.5	104.375
	R17	102.5	18.53			23	54.6364	59
	R18	108.8	20.04			21.3	78.875	94.0625
	R19	111.4	20.39			20.3	81.3529	94
	R20	109.7	20.51			21.3	97.1111	103.222
D2	R1	111.5	20.35			24	70.2353	78.1765
	R2	119.6	20.91			23.7	90.8	101.6
	R3	111.8	21.93			23.3	84	92.1667
	R4	102.8	20.7			24	76.4667	85.7333
	R5	114.1	20.87			23	78.9091	94.0909
	R6	122.2	20.5			23.7	80.7333	90.8667
	R7	114.6	20.08			26	75.3846	84.2308
	R8	115.1	20.99			24	77.8889	87.6111
	R9	118.2	20.41			25.3	75.7778	87.2778
	R10	117.4	21.23			23.3	82.4167	91.1667
T1	R1	116.1	22.93			23.7	64.7143	84.5714
	R2	115.1	21.1			25.7	56.55	65
	R3	115.6	22.55			25	63.6154	76.3077
	R4	118.9	20.23			20.3	122	145
	R5	113.1	22.48			24.3	73.4167	87.5833
	R6	122.6	23.29			26	73.9333	86.2667
	R7	120.5	23.82			26	70.2	80.7
	R8	120.6	23.2			25.6	67.4286	85.7857
	R9	116.1	23.27			25	75.3636	91.3636
	R10	115.4	24.55			24.7	66.125	82.25

## Sheet: GL and GW of Nipp+S1~T1
Replication	Nipponbare		S1		S2		S3		D1		D2		T1
	Grain length (mm)	Grain width (mm)	Grain length (mm)	Grain width (mm)	Grain length (mm)	Grain width (mm)	Grain length (mm)	Grain width (mm)	Grain length (mm)	Grain width (mm)	Grain length (mm)	Grain width (mm)	Grain length (mm)	Grain width (mm)
R1	7.14	3.2	8.07	3.37	7.56	2.76	6.99	3.16	7.82	2.97	7.75	2.9	8.43	2.86
R2	7.27	3.36	7.79	3.36	7.93	2.91	7.19	3.1	7.77	2.98	7.86	2.99	7.92	2.72
R3	6.96	3.25	7.9	3.58	7.59	3.13	7.39	3.34	8.26	2.81	7.35	2.89	8.23	2.86
R4	7.13	3.37	7.53	3.12	8.05	3.07	7.07	3.31	7.3	3.03	8.15	2.86	8.4	2.88
R5	6.61	3.3	8.09	3.56	7.1	2.9	7.26	3.19	7.66	3.08	7.79	2.99	8.28	2.73
R6	6.93	3.1	6.88	3.22	7.8	2.98	7.05	2.96	7.69	2.91	7.36	2.68	8.02	2.67
R7	7.38	3.17	7.82	3.25	7.51	3.21	7.3	3.05	7.3	2.94	7.54	3.2	7.99	2.86
R8	6.99	3.18	7.74	3.27	7.91	3.07	6.5	2.72	7.63	3.08	8.05	3.18	8.63	2.84
R9	6.95	2.96	7.97	3.21	7.73	3.04	7.17	3.17	7.49	2.87	7.94	3.15	8.51	3.02
R10	7.27	2.89	8.12	3.43	7.61	3.16	7.23	3.28	7.83	2.86	8.06	3.02	8.17	3.04
R11	6.94	3.06	7.77	3.46	7.2	3.07	6.54	2.99	7.54	2.98	7.45	2.82	8.62	3.05
R12	6.81	3.11	8.25	3.24	8	3.09	7.22	3.22	7.81	2.86	7.76	3	8.02	2.86
R13	6.88	3.17	7.29	3.05	7.43	3.04	6.67	3.28	8.1	2.98	7.45	3.22	8.06	3.12
R14	7.2	3.19	8.09	3.34	7.64	2.85	7.15	3.03	7.69	2.95	7.23	3.13	7.89	2.52
R15	6.67	3.08	8.26	3.19	7.33	2.98	7.25	3.1	7.45	3.04	7.4	2.89	8.33	2.91
R16	6.74	2.84	8.51	3.4	7.7	3.02	7.41	3.07	7.58	3.13	7.61	3.06	7.71	2.75
R17	6.88	3.5	7.38	2.99	7.74	3.07	6.9	3.01	7.63	2.98	7.75	2.96	7.48	2.93
R18	6.49	3.03	7.57	3.51	7.76	2.9	6.7	3.07	7.41	2.91	7.63	2.85	7.5	2.73
R19	6.87	3.23	8.29	3.23	7.23	3.01	6.76	3.07	7.68	2.96	7.84	2.96	8.07	3.03
R20	6.99	3.15	7.47	3.26	7.96	3.08	7.02	3.2	6.94	2.89	8.02	3.01	8.51	2.84
R21	7	3.21	7.13	3.18	7.24	2.88	7.18	3.08	7.92	2.89	7.96	3.01	8.09	2.74
R22	7.04	3.16	7.97	3.57	7.46	3.03	6.91	3.04	7.3	3.01	7.56	2.9	8.51	2.95
R23	7.29	3.18	8.33	3.45	7.41	3.02	6.6	2.74	7.53	3.05	7.86	2.92	7.72	2.79
R24	6.22	3.02	8	3.4	8.08	3.01	6.78	3.22	7.63	2.98	8.1	3.15	8.32	3.06
R25	6.8	3.21	8.01	3.43	7.8	3.12	6.76	3.03	7.08	3.04	7.85	2.73	8.34	2.84
R26	7.04	3.4	7.66	3.5	7.28	3.18	7.21	3.3	7.69	2.88	7.62	2.88	8.03	3.11
R27	7.33	3.26	7.85	3.23	7.82	3.17	7.42	3.12	7.55	2.8	7.61	2.92	8.26	2.88
R28	6.58	2.95	7.69	3.03	7.47	2.85	6.79	2.8	7.56	2.84	7.46	2.87	8.26	3.03
R29	7.41	3.33	7.74	3.04	7.81	3.1	7.11	3.28	7.6	3.08	8.08	3.06	8.6	3.1
R30	6.47	3.34	8.26	3.39	7.41	2.9	7.25	3.13	7.48	3.03	7.64	2.71	8.51	2.78
R31	6.9	3.31	8.24	3.41	7.19	3.01	6.97	3.03	8.02	3.01	7.5	2.81	7.78	3.1
R32	6.88	3.08	7.58	3.19	7.55	2.84	6.74	3.15	8	2.86	7.94	3.12	8.06	3
R33	7.2	3.42	7.31	2.94	7.15	2.98	7.17	2.7	7.26	2.91	8.05	3.13	8.48	3
R34	6.74	3.23	7.1	3.36	7.19	2.87	7.23	3.18	7.35	2.97	7.62	3.08	8.66	2.97
R35	7.19	3.21	7.4	3.12	7.66	2.82	7.05	3.02	7.63	3.08	7.88	2.94	8.43	2.92
R36	6.54	3.07	7.12	3.32	7.69	2.8	6.73	3.17	7.48	2.77	7.94	2.98	7.72	3.05
R37	6.25	3.3	7.76	3.55	7.19	3.16	6.91	3.23	7.99	3.01	7.7	2.72	7.88	2.88
R38	7.24	3.25	7.68	3.32	6.87	2.74	7.28	2.99	7.36	2.98	7.61	2.95	8.46	2.94
R39	7.29	3.31	7.59	3.4	7.68	2.89	6.68	3.05	8.12	3.16	7.81	3.04	8.4	2.73
R40	7.05	3.2	7.16	3.16	7.74	2.87	6.74	3.22	7.16	2.85	7.43	2.86	7.7	2.62
R41	7.05	3.22	7.84	3.35	7.14	3.03	7.36	2.75	7.92	2.93	7.86	3.13	7.89	2.82
R42	6.8	3.05	8.39	3.33	7.54	3.08	6.77	3.17	7.47	2.99	7.35	3.04	8	2.86
R43	6.55	3	7.46	2.91	7.64	3.04	6.86	3.06	8.08	3.05	8.16	2.93	8.17	2.93
R44	7.13	2.95	7.82	3.11	7.97	2.98	6.85	3.17	7.64	3.24	7.32	3.07	8.11	3.09
R45	7.08	2.7	7.68	3.15	8.09	2.95	7.08	3.18	7.8	3.09	7.45	2.83	7.5	2.78
R46	7.11	3.16	7.16	3.21	7.93	2.87	6.53	3.29	8.2	3.26	7.72	3.19	8.46	3
R47	6.98	2.97	7.98	3.21	7.66	3.06	7.12	3.09	8.04	3.05	7.69	3.04	8.3	2.69
R48	6.77	3.25	7.21	3.14	7.63	3	6.67	3.18	7.57	3.13	8.38	3.13	7.49	2.81
R49	6.59	3.19	8.1	3.22	7.22	2.88	6.9	3.08	8.25	3.19	7.73	3.06	8.13	2.45
R50	6.43	3.18	8.11	3.21	7.33	2.98	7.26	3.14	8.41	3.04	7.62	2.94	8.56	2.84
R51	7.23	2.98	7.54	3.24	7.54	2.97	7.35	3.22	7.68	2.95	7.87	2.82	8.3	3.02
R52	6.99	3.08	7.81	3.39	7.2	2.9	7.18	3.1	8.12	3.08	7.69	3.17	8.28	2.89
R53	6.77	3.3	7.98	3.29	7.31	3.2	6.98	3.17	8.25	3.15	7.88	3.12	8.27	3.04
R54	6.49	3.19	7.66	3.16	7.1	3.24	7.05	3.15	7.68	3.05	7.87	2.84	7.91	2.84
R55	7.06	3.28	7.88	3.41	7.07	3.01	7.25	3.13	7.87	2.9	7.71	3.04	8.13	3.09
R56	6.8	2.9	7.08	3.07	7.29	3.06	7.02	3.24	7.98	2.82	7.64	3.05	7.66	3.1
R57	6.81	3.03	8.41	3.49	7.66	3.03	6.79	3.2	7.66	3.07	7.36	3.02	7.51	3.02
R58	6.38	3.18	8.44	3.38	7.38	3.18	6.99	3.24	7.99	3.15	7.77	3.04	8.19	2.88
R59	6.9	3.19	6.75	3.26	8.09	3.09	6.78	3.03	7.95	2.86	7.65	3.12	7.98	2.56
R60	7.22	3.02	7.95	3.36	7.31	3.1	6.95	3.2	7.14	2.88	8.17	3.09	7.58	2.78
R61	6.99	2.96	7.83	3.16	7.25	3.03	7.44	3.26	7.89	3.09	7.94	2.99	8.65	2.61
R62	6.97	3.05	8.05	3.08	7.83	3.13	7.12	3.17	7.35	3.21	8.17	3.19	8.53	2.88
R63	6.63	3.28	8.52	3.39	7.52	3.14	6.99	3.14	7.92	3.18	7.49	2.81	8.65	2.79
R64	6.97	2.95	8.23	3.25	7.43	3.08	7.26	3.14	7.68	3.07	7.65	2.95	7.94	2.79
R65	7.38	3.26	8.09	3.33	7.63	2.96	7.14	2.92	7.73	3.12	8.12	3	8.46	2.81
R66	6.73	3.35	8.26	3.36	7.63	3.01	7.28	2.99	8.16	2.98	7.59	2.81	8.34	2.79
R67	6.88	3.26	7.53	3.59	7.91	3.15	6.78	3.05	7.46	3.02	7.7	3.34	8.65	2.98
R68	7.25	2.99	7.59	3.33	7.73	3.06	6.77	3.14	7.85	2.99	7.24	2.84	8.34	3.03
R69	6.87	3.27	8.19	3.34	7.28	2.94	6.4	2.9	8.01	3.18	7.8	3.06	7.58	2.99
R70	7.06	3.32	7.88	3.52	7.28	3.02	6.95	2.95	7.88	3.02	7.46	2.98	8.21	2.7
R71	6.95	3.32	8.57	3.27	7.68	3.04	7.03	3.06	7.99	3.11	7.81	2.95	8.52	3.11
R72	6.38	3.05	8.5	3.1	7.65	3.06	6.74	3.09	7.34	3.07	7.94	3	8.15	2.86
R73	6.42	3.15	8.28	3.35	7.36	3	7.21	3.23	7.62	2.78	8.26	3	8.33	2.86
R74	6.72	2.9	8.1	3.34	7.57	3.02	6.85	3.13	8.08	3.21	7.65	2.97	8.35	2.89
R75	7.24	3.11	7.62	3.22	7.31	3.12	7.36	3.2	7.98	3.1	7.88	3.01	8.18	2.72
R76	6.36	2.85	8.07	3.34	7.77	3.21	6.77	3.11	8.1	2.99	7.65	3.13	8.64	2.85
R77	6.99	3.19	7.31	3.27	7.03	3.22	7.1	3.03	7.87	2.98	7.51	3	7.8	3.11
R78	7.02	3.29	7.42	3.23	7.41	3.08	6.57	3.08	7.56	3.1	7.32	2.44	8.16	3.1
R79	7.18	3.15	8.4	3.16	7.83	2.95	6.78	3	6.93	2.98	8.26	2.88	7.72	2.69
R80	6.97	3.07	7.42	3.19	7.63	3.09	6.95	3.28	7.98	3.05	7.93	2.97	8.47	3.03
R81	7.24	3.1	7.72	3.18	8.18	3.18	6.64	3.08	7.76	3.04	8.17	2.86	7.6	2.78
R82	7.2	3.03	7.6	3.12	7.35	3.07	7.26	3.3	7.7	3.17	8.33	2.83	8.82	2.96
R83	6.97	3.32	7.59	3.32	8.07	3.06	7.3	3.1	7.5	2.89	7.54	2.84	8.41	2.9
R84	7.26	3.4	8.13	3.37	7.56	3.04	6.78	3.12	7.69	3.18	8.09	3	8.26	2.85
R85	6.55	3.36	8.17	3.36	7.45	2.95	7.17	2.94	7.5	3.1	7.57	2.76	8.56	3.06
R86	7.37	3.41	7.94	3.19	7.08	2.91	7.26	3.33	7.35	3.17	7.7	2.73	8.65	2.72
R87	6.69	3.21	7.83	3.23	7.41	3.14	7	3.03	7.79	3.16	7.62	3.06	8.43	2.86
R88	6.94	3.31	8.31	3.21	7.31	2.99	7.06	3.25	8.25	3.25	7.8	2.74	7.91	2.83
R89	6.9	3.18	8.06	3.32	7.2	2.83	6.8	3.26	7.9	3.21	7.71	2.82	8.04	2.95
R90	7.29	3.04	8.1	3.52	6.6	3.06	7.15	3.2	7.67	3.15	7.84	2.79	8.48	2.83
R91	7.56	3.27	8.35	3.19	6.9	3.08	6.96	3.26	7.82	2.66	8.04	3.05	7.53	2.75
R92	6.89	3.04	8.43	3.37	7.43	3	7.1	3.19	7.27	2.95	7.64	2.94	8.2	2.66
R93	7.5	3.17	6.76	3.22	7.78	3.2	6.67	3.16	7.98	3.06	7.13	2.97	7.86	2.9
R94	6.4	3.15	7.72	3.48	7.42	2.93	6.74	2.7	7.67	3.14	7.85	3.09	8.45	2.65
R95	6.81	2.68	7.78	3.15	7.31	3.07	6.66	2.92	8.06	3.08	8.12	2.91	8.39	3.06
R96	7.13	3.26	7.99	3.3	7.18	2.8	7.29	3.25	7.67	2.97	7.74	3.1	7.87	2.78
R97	6.96	3.16	7.51	3.3	7.62	3.21	7	7	7.84	3.11	7.48	3.11	8.37	2.86
R98	7.13	3.25	7.6	3.51	7.2	2.84	7.32	2.96	7.68	3.03	7.88	3.1	7.64	2.66
R99	6.38	2.98	7.04	3.33	7.2	2.96	7.07	3.03	7.29	2.9	7.7	2.85	8.4	2.75
R100	6.77	3.46	7.89	3.26	7.26	3.11	7.25	3.03	8.14	2.98	7.83	3.06	7.81	2.6
R101	6.99	3.07	8.64	3.41	7.03	3.3	6.64	2.84	7.46	3	7.95	3.06	8.32	3.01
R102	7.25	3.09	8.5	3.36	7.23	3.12	7.36	3	7.59	3.09	8.07	2.59	7.5	2.84
R103	6.95	3.12	7	3.19	7.16	3.11	7.46	3.05	8.09	3.12	7.75	2.86	8.58	2.87
R104			7.96	3.53	7.49	3.1	6.59	2.98	7.96	3.02	7.64	3.03	8.7	3.21
R105					7.36	3.02	6.73	3.07	6.8	3.04	7.33	2.79	8.08	3.22
Average	6.93	3.15757	7.82788	3.29	7.496	3.02495	6.99781	3.13819	7.71238	3.01895	7.75229	2.96638	8.17076	2.87952
St.D.	0.293425	0.156384	0.430073	0.144296	0.307251	0.114658	0.254377	0.405009	0.317731	0.117546	0.263034	0.145497	0.344879	0.153825
T-text ( vs Nipp)			1.21751e-42	1.49639e-09	1.98842e-30	3.87026e-11	0.0664824	0.663123	1.73761e-45	8.99188e-12	6.15008e-54	6.42222e-17	5.93192e-72	2.21683e-28
Estimation of additive effects			0.448942	0.0662136	0.283	-0.0663102	0.0339048	-0.00969117
Estimation of epistatic effects									-0.340752	-0.0692136	3.57619	1.55435	3.33649	1.4447

## Sheet: Data of glume cells
Materials and replications		Cell length (μm)	Cell length (μm)	Cell no.
Nipponbare	R1	98.5075	43.2836	51
	R2	97.7612	39.5522	48
	R3	105.224	38.0597	54
	R4	101.493	39.5522	50
	R5	98.5075	35.0747	47
	R6	104.478	41.0448
	R7	117.164	45.5223
	R8	111.194	44.7761
	R9	95.5223
	R10	110.448
CSSL-Z1357	R1	129.851	35.8209	42
	R2	105.97	36.5672	41
	R3	123.881	34.3284	60
	R4	116.418	38.8059	59
	R5	108.955	34.3284
	R6		32.8358
	R7		32.0896
	R8		27.612
	R9		37.3134
	R10		29.4776
	R11		29.8507

## Sheet: Data for QTL mapping via F2
Individual ID of F2	Phenotype							Genotype (-1 and 1 correspondingly stand for homogenous genotypes of Nipp and CSSL-Z1357, 0 for heterozygous genotype of Nipp/CSSL-Z1357)
	PH	PL	GL	GW	TGW	GPP	SPP	RM1268	RM6266	RM6303	RM7412	RM455	RM6976	RM1103	RM1226	RM7376
1	99.6	19.86	8.75	3.37	28.33	79.41	85.24	1	1	1	1	0	-1	-1	-1	-1
2	114.5	21.73	7.47	3.18	25	99.17	103.33	0	1	1	1	-1	1	0	0	0
3	90	16.94	7.57	3.15	25	55.63	70.38	1	1	0	0	0	0	0	0	0
4	114	21.09	7.85	3.4	26.27	90.47	95.6	0	-1	0	1	1	1	0	0	0
5	109	23.31	7.46	3.22	26	96.3	126.6	-1	0	0	1	0	1	-1	1	-1
6	98.6	21.55	8.1	3.4	24.33	101.7	109.5	0	1	1	0	1	0	0	1	0
7	92	18.22	7.49	3.19	25	71.21	78.71	0	0	0	0	-1	1	1	1	1
8	80.5	18.13	7.69	3.47	26	68.1	74.1	1	0	0	1	-1	1	0	0	0
9	89.9	22.29	7.37	3.21	23.37	118.8	144.1	-1	-1	0	1	-1	-1	0	0	0
10	117.9	21.81	7.6	3.28	27.97	96.87	101.4	-1	-1	-1	1	0	1	1	0	1
11	74.5	16.9	7.07	3.27	24.33	38.85	45.85	1	-1	-1	1	-1	0	0	0	0
12	109.9	21.97	7.17	3.38	25.67	119.53	138.2	0	-1	0	0	0	0	0	1	0
13	100.1	22.33	7.26	3.28	24.33	105.64	112.27	0	0	0	1	-1	-1	0	0	0
14	107.2	22.45	7.57	3.58	24.67	106	114.55	0	0	1	1	-1	0	1	-1	1
15	139.9	22.15	7.83	3.1	23	90.2	93.5	-1	-1	0	1	1	-1	0	0	0
16	116	21.62	7.73	3.53	27.33	101.89	121	-1	1	0	1	1	0	-1	-1	-1
17	118.8	23.77	7.4	3.38	26	126.45	132.73	0	1	1	1	0	-1	1	1	1
18	118.1	23.04	7.49	3.33	26.73	118	147	-1	1	-1	0	0	1	0	0	0
19	123.4	23.77	7.93	3.37	25.67	121.3	133.2	1	-1	1	0	1	1	0	0	0
20	108	21.24	7.69	3.54	26.13	115.64	122.73	0	-1	0	0	1	0	0	0	0
21	103.9	20.85	7.58	3.27	25.73	94.64	96.91	0	0	-1	1	0	1	0	0	0
22	102	20.34	7.46	3.42	24.5	93.55	96.64	0	0	-1	1	-1	1	0	0	0
23	94.1	17.92	7.77	3.4	25.33	61.85	64.69	0	0	-1	1	1	0	0	-1	0
24	104.2	22.29	7.58	3.2	25.73	100.56	105	0	0	0	1	0	-1	0	1	0
25	103.5	19.57	7.74	3.4	26.33	72.25	74.92	1	0	0	1	1	0	-1	-1	-1
26	116.6	26.77	7.95	3.11	21.37	43.2	159.27	1	0	1	0	0	0	1	1	1
27	96	19.66	7.42	3.33	25.83	55.64	81.36	0	-1	0	0	0	0	0	0	0
28	99	19.42	7.97	3.43	27.67	70.33	73	-1	0	1	1	0	-1	0	0	0
29	87.3	17.04	7.79	3.47	24.82	44	54.27	0	0	0	1	0	-1	-1	0	-1
30	88	16.36	7.4	3.24	25.13	45.8	53	1	1	-1	1	-1	1	0	1	0
31	132.6	24.92	7.67	3.19	24.1	126	152.29	0	0	1	0	0	0	0	0	0
32	104	19.94	7.92	3.03	24	86.25	95.25	0	-1	0	0	0	0	0	0	0
33	129	24.46	7.9	3.26	25	103.33	158.33	-1	1	-1	1	-1	0	0	0	0
34	106.6	19.13	7.46	3.31	24.6	79.67	91.75	-1	0	0	0	1	0	-1	-1	-1
35	113	25.06	7.6	3.19	25.43	116.47	139.06	0	0	-1	1	0	0	1	1	1
36	107.4	20.52	7.97	3.37	25	88.9	93.3	0	1	-1	0	0	0	0	1	0
37	96.6	18.63	7.14	3.34	24.33	87.5	91.75	0	-1	0	0	-1	-1	0	1	0
38	112	19.33	7.31	3.23	24.9	105.87	114.4	1	-1	1	0	0	0	0	0	0
39	105.2	20.94	7.23	3.3	25.33	106.79	116.07	1	0	1	1	-1	0	0	-1	0
40	90.5	17.7	7.77	3.38	23.33	65.56	68.94	0	0	1	0	1	-1	0	1	0
41	114.6	19.25	7.62	3.43	25.27	97.92	106.25	0	0	0	1	1	1	0	-1	0
42	88	17.45	7.76	3.31	23.77	67.5	81.2	0	0	-1	0	1	-1	-1	-1	-1
43	99	21.49	7.56	3.43	25.7	102.91	106	0	-1	-1	1	-1	-1	1	1	1
44	103	20.41	7.78	3.65	28.9	90.15	94.69	0	-1	0	0	0	1	0	0	0
45	77	16.05	7.67	3.38	26.67	46.2	48.3	0	-1	0	1	0	0	0	0	0
46	96	19.75	7.54	3.36	24	64.92	68	1	0	0	0	0	0	-1	0	-1
47	113	21.57	7.57	3.43	28.67	61.2	97.3	-1	-1	0	0	0	-1	0	0	0
48	98	19.79	7.89	3.34	29.87	67.13	96.5	1	1	1	0	0	0	-1	-1	-1
49	116	18.88	7.5	3.21	26	78.7	87.4	0	0	0	1	-1	0	0	0	1
50	105.5	20.24	7.41	3.3	26.13	95.41	98	0	-1	-1	1	0	0	0	0	0
51	115.6	21.1	7.57	3.36	27.5	89.08	91.75	0	1	0	1	0	0	-1	-1	-1
52	89.6	18.52	7.66	3.43	26.67	76.31	83.38	-1	0	1	1	0	-1	-1	-1	-1
53	74	17.27	7.69	3.38	24.56	41.8	44	1	0	1	0	0	0	1	1	1
54	108.6	22.43	8.21	3.35	25.37	93.25	107.25	1	1	0	0	-1	0	-1	-1	-1
55	118.1	21.77	7.6	3.35	21.77	120	124.17	-1	-1	-1	1	0	1	-1	-1	-1
56	101.1	20.73	7.69	3.43	26.67	50.43	76.5	0	0	-1	0	0	1	1	-1	1
57	104.6	21.99	7.84	3.54	27.87	87.86	101.43	-1	0	1	1	-1	0	-1	-1	-1
58	111	23.86	7.68	3.33	20.47	72.09	110.09	1	0	0	1	-1	0	-1	-1	-1
59	102.2	21.76	7.44	3.36	25.47	83.67	96	1	0	1	0	0	-1	-1	-1	-1
60	103	21.63	7.88	3.1	24.57	71.46	79.38	1	0	0	0	0	0	1	-1	0
61	101.5	19.55	7.8	3.19	24.73	65.6	68.1	0	0	0	1	-1	1	1	-1	1
62	117	23.01	7.49	3.4	24.87	144.33	160.92	-1	-1	1	0	0	1	-1	-1	-1
63	112.2	22.8	8.75	3.34	28.97	82.33	88.75	0	1	-1	0	0	-1	1	-1	1
64	113.6	20.8	7.96	3.43	27.7	90.56	92.89	0	-1	-1	1	0	0	0	-1	0
65	105	21.29	7.77	3.63	25.97	80.64	83.82	0	0	1	0	-1	-1	0	-1	0
66	128	21.26	8.14	3.28	27	62.3	86.6	1	1	0	0	0	1	0	-1	0
67	114	20.7	7.01	3.34	28.73	46	55.62	1	1	-1	1	0	0	0	-1	0
68	121	23	7.74	3.57	18.63	118	171.5	0	0	0	1	0	0	0	-1	0
69	121.2	25.26	8.22	3.39	28.13	109.45	121	0	1	0	1	0	1	1	-1	1
70	134	22.33	8.17	3.33	26.73	99.56	105.89	0	1	0	0	0	0	0	-1	0
71	110	20.78	7.57	3.38	25.07	63	64.91	1	0	-1	1	0	-1	-1	-1	-1
72	116.2	21.03	7.81	3.27	23.37	96.13	108.25	-1	0	1	0	-1	0	0	-1	0
73	111	23.19	8.5	3.11	25.23	96.11	104	1	1	0	0	0	0	-1	-1	-1
74	112	23	7.84	3.45	27.3	53	58.71	1	0	0	1	1	0	0	-1	0
75	110	20.95	8.79	3.42	29.07	63.25	66.5	1	1	-1	1	0	0	0	-1	0
76	105.6	24.71	7.73	3.38	26.13	120	140.93	-1	-1	0	1	0	0	-1	-1	-1
77	107.5	23.66	8.43	3.31	28.37	35.11	39.33	-1	0	-1	0	1	0	0	1	0
78	106	20.69	7.76	3.45	26.37	85.55	90.09	-1	0	-1	1	0	0	0	1	0
79	121.5	24.54	8.81	3.42	30.33	98.15	103.54	-1	1	-1	1	0	-1	0	-1	0
80	106.8	23.5	7.82	3.47	24.2	118.75	124.75	1	-1	-1	1	-1	1	0	-1	0
81	125	25.86	8.34	3.35	27.5	95.5	108.63	0	1	-1	1	-1	-1	1	-1	1
82	119	23.5	7.93	3.51	23.6	98.78	134.33	1	1	1	1	0	0	1	-1	1
83	110	21.27	7.79	3.24	24.93	37.6	39.9	1	0	0	1	0	1	1	-1	1
84	114	23	8.35	3.38	27.8	87.5	104.38	-1	0	-1	1	1	1	0	-1	0
85	115	21.99	8.27	3.36	29.7	81.69	98	0	1	0	1	1	1	1	-1	1
86	104.6	18.8	8.18	3.35	25.83	55.75	59.58	1	0	1	1	1	1	0	-1	0
87	107	21.18	7.65	3.42	28.37	72.11	74.89	1	-1	1	1	-1	0	1	-1	1
88	105	20.6	7.58	3.54	25.8	90.22	92.67	-1	-1	0	0	-1	0	0	-1	0
89	110.1	21.55	8.1	3.23	26.53	96	101.17	0	1	0	0	0	0	-1	-1	-1
90	105	21.13	7.63	3.33	23.2	73.67	108.17	1	-1	1	0	0	0	0	-1	0
91	121.1	24.64	7.7	3.29	24.03	114	144.88	0	-1	-1	1	0	-1	1	-1	1
92	120	20.14	7.63	3.52	22.47	71	104.58	0	0	0	0	1	0	1	-1	1
93	118.2	22.83	8.2	3.47	24.97	106.5	154	0	1	0	1	1	-1	-1	-1	-1
94	111.2	22.02	7.99	3.22	24.6	94.67	114.56	-1	1	1	1	0	0	-1	0	-1
95	128	22.63	31.66	3.27	27.17	112	115.89	0	0	-1	0	1	-1	1	0	1
96	117	20.58	7.75	3.42	24.5	69.15	85.15	0	-1	0	1	1	1	0	0	0
97	105.4	19.58	7.32	3.37	22.87	94.55	100.36	-1	-1	-1	-1	-1	-1	-1	-1	-1
98	92.2	18.76	7.21	3.29	20.7	96.75	108.25	-1	-1	-1	-1	-1	-1	-1	-1	-1
100	94.6	20.43	7.32	3.45	24.7	92.62	98.08	-1	-1	-1	-1	-1	-1	-1	-1	-1
101	110.5	21.04	7.38	3.34	26.02	66.75	106.88	-1	0	0	0	0	0	0	0	0
102	111.5	24.31	7.69	3.29	25.7	80.5	89.13	0	0	0	1	0	0	1	0	1
103	121.5	21.41	7.9	3.48	24.25	114.5	128.4	0	-1	0	0	0	0	1	0	1
104	102.7	19.14	7.39	3.4	21	88.67	108	-1	-1	0	0	-1	0	1	0	-1
105	127	23.18	8.59	3.45	25.37	35.33	101.17	1	1	0	1	1	1	-1	-1	-1
106	113	19.01	7.5	3.46	26.1	80.71	96.64	0	-1	0	0	0	1	-1	-1	-1
107	105	20.75	7.79	3.26	24.73	100.5	105.42	-1	0	1	1	0	1	1	0	1
108	95	19.1	7.34	3.35	24	107.2	114.5	-1	-1	-1	-1	-1	-1	-1	-1	-1
109	104	22.05	7.52	3.29	24.87	24.92	44.17	1	0	0	1	0	0	0	1	0
110	115.5	20.61	7.36	3.32	24.77	76.47	102.6	0	-1	-1	0	0	1	0	0	0
111	112.5	21.21	7.28	3.36	24.9	105.91	113.82	-1	0	1	0	-1	0	1	0	1
112	127	26.09	7.91	3.23	23	60.78	131.33	1	0	-1	0	1	-1	1	1	-1
113	119	23.17	7.24	3.32	23	127.45	136.36	0	-1	0	-1	-1	0	1	1	1
114	123	22.83	7.72	3.51	27.33	88.29	94	-1	0	0	0	0	-1	1	1	1
115	110	20.78	7.55	3.38	25.9	96.63	103.25	0	-1	0	0	0	0	0	0	0
116	110	23.43	7.7	3.38	26.77	102.83	108.42	-1	-1	-1	1	0	0	0	-1	-1
117	112	22.86	7.78	3.22	23.57	118.78	124.22	-1	0	0	0	1	-1	1	1	1
118	113	22.06	7.5	3.45	25.63	80	117	0	0	1	0	1	0	0	0	0
119	94	19.74	7.22	3.33	22.07	81.17	94	-1	-1	-1	-1	1	-1	-1	-1	-1
120	109	22.88	8.15	3.27	24.6	92.75	96.5	-1	0	-1	1	-1	1	0	1	0
121	122	22.23	8.26	3.42	28.07	95.5	113.1	0	1	0	1	1	0	-1	0	-1
122	94	17.74	7.27	3.45	21.8	72.92	85.23	-1	-1	-1	-1	0	-1	-1	-1	-1
123	116	21.76	7.79	3.5	26.17	89.71	96.14	-1	0	1	1	-1	0	-1	-1	-1
124	110.5	23.38	8.32	3.43	26.05	98	119	0	1	0	1	0	0	-1	0	-1
125	112.2	24.16	8	3.53	28.3	84.69	93.92	0	-1	-1	0	1	0	0	-1	0
126	115.8	23.06	7.84	3.34	26.17	116.56	122.56	-1	0	-1	1	-1	1	1	1	1
127	122.5	25.49	7.6	3.28	24.93	114.57	130.71	-1	0	0	1	1	0	1	1	1
128	116	24.92	7.7	3.39	27.33	112.33	116.67	0	0	1	1	0	1	-1	1	-1
129	113.3	22.82	7.27	3.34	24.23	109.69	127.85	0	0	0	1	-1	0	-1	1	-1
130	118.3	22.6	7.71	3.45	27.37	95.63	98	1	1	0	0	0	1	1	1	1
131	103	20.64	7.55	3.35	24.63	91.2	99.3	0	-1	0	0	0	0	-1	0	-1
132	93.5	18.82	7.34	3.39	22.33	93.38	99.75	-1	-1	-1	-1	-1	-1	-1	-1	-1
133	122.3	23.86	8.18	3.26	26.37	120.2	135	0	1	0	0	0	0	0	0	0
134	93.5	21.77	7.38	3.4	21.17	111.9	121.1	-1	-1	-1	-1	-1	-1	-1	-1	-1
135	105	21.99	7.9	3.45	28.57	106.93	110.6	0	0	0	1	0	1	0	-1	0
136	104	22.25	7.75	3.4	27.47	69.17	70.83	1	0	0	0	0	0	0	0	-1
137	96	19.17	7.1	3.41	23.9	88.89	95.56	-1	-1	-1	-1	-1	-1	-1	-1	-1
138	100	19.6	7.23	3.34	23.03	87.58	95.5	-1	-1	-1	-1	-1	-1	-1	-1	-1
139	112	22.92	7.35	3.24	24.47	110.56	118.33	0	-1	-1	1	-1	0	1	0	1
140	96.4	19.17	7.35	3.32	22.43	89.64	99.91	-1	-1	-1	-1	-1	-1	-1	-1	-1
141	122	22.92	7.65	3.15	25.17	101.25	107.33	-1	0	-1	0	1	0	0	1	0
142	122	23.88	7.36	3.27	22.17	61.25	99.38	0	0	0	0	-1	0	0	1	0
143	106	23.45	8.11	3.37	26.5	114.5	124.25	1	0	-1	0	0	-1	-1	-1	-1
144	92.5	20.33	7.35	3.6	25.37	96.61	106.11	-1	-1	-1	-1	-1	-1	-1	-1	-1
145	117.6	24.57	7.92	3.55	27.17	65.13	70.88	1	0	-1	1	1	1	0	0	0
146	116	20.41	8.06	3.55	22.87	46.89	115.22	0	0	0	0	0	0	-1	-1	-1
147	126	22.31	7.97	3.4	27.37	95.08	110.69	-1	0	1	0	1	1	0	-1	0
148	96	19.35	7.14	3.34	23.3	87.33	99.67	-1	-1	-1	-1	-1	-1	-1	-1	-1
149	108	21.71	7.89	3.42	27.03	95.6	101	-1	-1	0	1	0	0	-1	-1	-1
150	95.6	19.51	7.21	3.35	22.9	77.5	93.5	-1	-1	-1	-1	-1	-1	-1	-1	-1
151	100	18.63	7.16	3.43	24.5	85.11	93.89	-1	-1	-1	-1	-1	-1	-1	-1	-1
152	94.4	20.97	7.06	3.37	25.67	98	103.78	-1	-1	-1	-1	-1	-1	-1	-1	-1
153	116	22.26	8.55	3.26	27.77	98.19	103.19	0	1	0	0	0	1	1	0	0
154	113.8	22.05	7.97	3.31	28.23	87.4	110.8	0	0	-1	0	0	1	0	1	0
155	111	22.82	8.19	3.23	25.8	65.7	75.1	0	1	0	1	0	0	0	1	0
156	128.7	25.2	8.42	3.35	22.47	65.67	172.67	0	1	1	0	-1	1	1	1	1
157	111.6	24.1	7.55	3.42	26.67	159.29	178.57	1	-1	0	1	0	0	0	0	0
158	127.6	20.33	7.77	3.46	24.67	96.5	104.33	0	-1	0	0	0	1	0	1	0
159	119.2	24.08	7.62	3.46	24.8	126.11	144.11	0	-1	0	0	0	0	0	-1	0
160	115.6	22.12	8.02	3.31	27.07	98	101.44	0	0	0	0	1	-1	0	1	0
161	122	24.07	8.06	3.35	24.57	59.56	72.33	0	0	0	1	0	-1	0	0	0
162	113.8	23.09	7.53	3.24	26.07	133.25	136.75	-1	0	0	1	0	1	-1	-1	-1
163	90.7	20.58	7.14	3.45	26	98.38	102.5	-1	-1	-1	-1	-1	-1	-1	-1	-1
164	112.6	22.34	7.34	3.42	27.03	114.3	118.3	0	0	0	0	-1	1	0	1	0
165	120.7	18.96	7.27	3.37	25.07	87.27	91.55	-1	-1	-1	-1	-1	-1	-1	-1	-1
166	121	22.66	8.14	3.33	25.5	93.38	97	0	0	0	0	1	0	0	1	0
167	101	19.54	7.09	3.32	24.03	96.38	101.54	-1	-1	-1	-1	-1	-1	-1	-1	-1
168	96.7	17.93	7	3.4	22.7	84.8	89.6	-1	-1	-1	-1	-1	-1	-1	-1	-1
169	120.5	24.1	7.55	3.42	26.67	111.5	125	-1	0	0	1	-1	0	0	0	0
170	125.5	24.45	8.47	3.37	23.2	64.2	141.6	0	1	1	0	1	0	-1	-1	-1
171	111.3	21.89	7.49	3.21	25.03	104.5	107.7	0	0	1	0	0	0	0	1	0
172	123	25.19	8.15	3.28	27.7	110.86	140.86	-1	1	-1	1	0	-1	1	-1	1
173	118.5	21.56	7.63	3.39	25.97	105.17	118.92	0	0	-1	1	-1	1	0	0	0
174	121.8	23.53	7.46	3.19	23.13	114.57	130.71	0	0	0	0	0	-1	1	1	1
175	120.5	23.81	7.28	3.4	24.83	106.88	115.94	-1	0	0	1	-1	0	1	1	1
176	95.5	18.28	7.14	3.28	22.9	82.38	86.38	-1	-1	-1	-1	-1	-1	-1	-1	-1
177	124.5	22.91	7.98	3.13	26.93	107.8	113.9	1	1	0	1	-1	0	0	1	0
178	116.3	24.49	7.43	3.27	23.57	107.33	120.92	0	-1	0	0	-1	-1	1	1	1
179	80.6	17.6	7.3	3.37	26.33	50.42	53.17	0	-1	-1	1	1	-1	0	-1	0
180	104	23.11	7.7	3.23	25	107.29	113.07	0	-1	1	0	0	0	-1	-1	-1
181	102	19.58	7.69	2.99	25.67	85	89.55	-1	1	0	1	0	0	-1	-1	-1
182	116	22.19	8	2.95	26.67	97.13	123.5	-1	1	0	0	-1	0	1	-1	1
183	103	20.2	7.63	3.02	25.33	94.21	96.71	1	0	0	0	0	-1	0	-1	0
184	90	20.47	7.59	3.28	28.33	60	96.6	1	1	0	0	0	1	0	-1	0
185	13	21.5	8.03	3.2	28.33	87.5	92.3	-1	1	-1	1	-1	0	0	-1	0
186	108.5	21.43	8.22	3.27	31.33	87.56	91.22	1	1	-1	1	0	0	1	-1	1
187	109	24.43	7.68	3.28	26	106.08	111.33	0	0	1	0	1	1	1	-1	1
188	108.5	22.31	7.96	3.24	25.93	116	127.64	-1	1	0	1	-1	-1	-1	-1	-1
189	95	20.83	7.88	3.14	25.9	83.33	95.11	0	1	1	0	0	0	-1	-1	-1
190	100.5	19.79	7.69	3.33	23.23	95.14	100	0	-1	-1	0	0	-1	-1	-1	-1
191	106.3	21.27	7.67	3.3	25.7	99.6	123.3	0	0	0	0	0	0	0	-1	0
192	86.4	16.37	8.09	3.34	26.83	53.5	56.17	0	1	1	1	-1	0	0	-1	0
193	76.7	17.93	7.4	3.49	25.17	59.88	77.13	0	-1	0	1	-1	0	1	-1	1
194	102.4	22.98	8.35	3.37	26.17	92.67	98.78	-1	0	-1	1	1	-1	-1	-1	-1
195	101	19.98	7.74	3.37	25.9	74.23	91.62	0	0	0	1	1	1	0	-1	0
196	116.5	23.1	7.83	3.31	26.37	113.67	124.47	0	0	1	0	1	1	0	-1	0
197	90.2	17.04	7.62	3.34	25.6	73.14	77.07	1	0	0	1	1	1	-1	-1	0
198	107.5	18.92	8.18	3.3	28.07	88	95.07	0	1	0	1	0	-1	-1	-1	-1
199	86.4	18.13	7.44	3.34	26.07	81.79	86.64	0	-1	-1	0	-1	1	-1	0	-1
200	90	19.7	7.4	3.25	25.87	74.13	98.88	-1	0	-1	0	1	0	0	-1	0
201	106	21.65	7.93	3.36	25.57	82.27	121.73	0	0	-1	0	0	-1	1	0	1
202	84	16.63	7.78	3.35	27.07	60.43	68.14	1	1	-1	0	0	1	-1	-1	0
203	88.8	20.56	7.57	3.31	24.6	86.5	93.5	-1	-1	1	0	-1	-1	0	0	0
204	114	22.94	7.66	3.32	25.67	117.73	126.36	1	-1	0	0	1	1	1	-1	1
205	88.5	19.31	7.7	3.27	24.33	85.71	89.64	1	0	0	0	1	0	1	-1	1
206	112	21.29	7.75	3.32	25.67	101.82	113.82	0	0	1	1	0	0	1	-1	1
207	114	22.69	8.51	3.29	27.03	92	97.82	-1	1	0	0	1	0	0	-1	0
208	100	20.62	7.48	3.13	23.2	100.67	103.92	0	0	0	0	0	0	1	-1	1
209	106.3	19.46	7.77	3.42	27.1	86.82	89.09	0	0	1	1	0	0	0	-1	0
210	93.2	20.67	7.62	3.36	25.27	87.6	103.8	0	0	0	1	1	-1	0	-1	0
211	85.8	20.53	7.96	3.44	26.03	99	106.38	1	-1	1	0	-1	-1	-1	-1	-1
212	85.4	20.99	7.23	3.31	23.23	95.1	124.4	1	-1	-1	0	0	1	0	-1	0
213	124.4	24.76	7.83	3.43	24.2	161.23	179.08	-1	1	1	1	0	1	0	-1	0
214	103.3	19.64	8.13	3.26	29.07	71.55	88.64	-1	1	0	1	0	1	-1	-1	-1
215	97	19.35	7.23	3.35	25.73	93.36	99.71	0	0	0	0	-1	1	-1	-1	-1
216	115.4	19.66	7.75	3.31	25.73	114.25	118	-1	1	1	1	1	0	1	-1	1
217	81.4	15.9	7.97	3.49	28.3	33.93	59.5	1	1	0	0	0	-1	0	-1	0
218	95.2	20.17	7.87	3.36	27.67	74.5	78	0	-1	1	1	0	-1	0	-1	0
219	96.3	16.76	7.52	3.3	23.67	41	48.78	0	0	-1	1	1	1	0	-1	0
220	85.7	19.3	7.64	3.35	23.83	75.29	79.57	0	1	0	1	0	0	0	-1	0
221	98.2	20.8	8.1	3.46	26.8	76.82	82	0	0	0	0	0	0	0	-1	0
222	81.2	18.45	7.87	3.25	25.63	73.27	80.73	1	1	0	0	0	1	-1	-1	-1
223	76	18.06	7.27	3.34	23.97	78.23	83.38	1	0	-1	-1	0	0	-1	-1	-1
224	110.5	22.66	7.59	3.29	23.73	114.64	130.91	0	-1	0	1	-1	0	0	-1	0
225	83.9	17.94	7.49	3.2	22.97	71.92	79	0	0	0	0	-1	-1	1	-1	1
226	80.5	18.34	7.78	3.06	22.83	68.55	72.09	1	1	-1	0	0	-1	0	-1	0
227	122.6	25.27	7.45	3.37	23.43	153.33	190.78	0	0	0	1	-1	0	-1	-1	-1
228	76	16.66	7.32	3.29	24	48.73	54.73	0	-1	0	0	-1	1	0	-1	0
229	102.8	19.1	7.58	3.31	24.4	73.22	91	-1	0	0	0	-1	-1	1	-1	1
230	103.3	20.93	7.71	3.28	25.47	106.1	113.6	-1	-1	0	1	-1	0	-1	-1	-1
231	103.2	19.67	7.81	3.31	25	92.73	96.73	1	0	-1	1	1	1	-1	-1	-1
232	85.2	19.22	8.61	3.19	27.7	76.06	81.06	1	1	-1	0	0	1	1	-1	1
233	96.2	20.94	8.09	3.38	25	105.13	110.38	0	1	0	0	0	-1	0	-1	0
234	83.4	17.77	7.41	3.45	25.77	57.5	64.5	1	-1	1	1	0	1	1	-1	1
235	99.5	20.93	7.41	3.31	24.7	116.92	129.08	1	0	1	0	-1	-1	-1	-1	-1
236	111.2	21.95	8.1	3.11	25.87	78.5	107.6	-1	1	1	0	0	0	0	-1	0
237	90.2	18.56	7.48	3.56	26.1	48.4	81.3	0	-1	0	0	0	-1	0	-1	0
238	116.2	23.01	7.87	3.45	26.27	76.75	126.42	0	0	1	0	0	0	1	-1	1
239	129.6	22.2	8.09	3.26	29.1	98.88	110.38	0	0	0	1	1	1	1	-1	1
240	103	21.63	7.77	3.24	24.23	104.09	110.27	-1	-1	1	1	0	0	1	-1	1
241	120.7	23.38	8	3.38	26	113.64	126.36	-1	0	0	1	1	1	1	-1	1
242	80.2	18.67	8.27	3.31	28.83	47	51.25	0	1	1	1	0	-1	-1	-1	-1
243	114.4	20.71	7.63	3.3	23.17	75.13	92.6	0	0	0	0	0	-1	1	-1	1
244	98.2	19.86	7.21	3.35	24.53	92.5	98.57	-1	-1	-1	-1	-1	-1	-1	-1	-1
245	104.8	20.1	8.31	3.14	27.87	97.2	106.8	0	1	-1	1	0	0	-1	-1	-1
246	105.6	21.04	7.47	3.21	24.37	113.15	124.08	0	0	-1	1	-1	0	1	-1	0
247	107.4	20.1	7.14	3.39	25.63	54.63	58.5	1	-1	0	1	0	1	1	-1	1
248	102.6	20.6	7.21	3.34	25.93	121.25	127.88	0	-1	0	0	0	1	0	-1	0
249	103.6	20.95	7.94	3.31	27.87	76.36	100	-1	1	0	1	0	-1	0	-1	0
250	104.6	20.02	7.88	3.4	26.27	89.45	92.64	0	1	0	1	1	0	1	-1	1
251	107.2	21.74	7.5	3.31	23.37	65.18	109.09	-1	-1	0	0	0	0	-1	-1	-1
252	93.4	18.8	8.25	3.37	27.63	77.75	81.13	-1	0	0	1	1	1	0	0	0
253	100.7	20.96	7.31	3.36	24.63	92.94	103.13	-1	-1	-1	-1	0	-1	-1	-1	-1
254	105.4	19.83	7.77	3.42	27.1	119.38	122.5	0	1	-1	0	1	0	0	-1	0
255	107.9	20.4	7.58	3.2	22.37	85.54	88.08	-1	0	0	0	1	0	1	-1	1
256	84.3	16.75	7.59	3.43	25.53	69.27	73.09	1	0	0	0	1	0	0	-1	-1
257	96.2	22.85	7.86	3.16	24.1	96.56	100.44	-1	1	0	1	0	0	0	-1	0
258	80	19.72	8.07	3.32	26.17	81.64	85.64	0	0	0	0	0	0	0	-1	0

## Sheet: Chalkiness analysis
Chalkiness degree (%)		Chalky grain rate (%)
Nipponbare	T1	Nipponbare	T1
35.64	9.96	60.45	39.13
25.25	15.15	73.33	44
34.35	9.31	72.62	36.84
33.88	11.05	59.3	38.46
34.57	13.84	70.83	48.78
30.2		72.22	38.89
33.67		68.12
24.75		77.97
30.2
37.47
